# Supplementary material
Source: Springer Nature journal article supplement (https://www.springermedizin.de/resource/supplementary/13051_2011_219_MOESM8_ESM.pdf/9670184)

## Survival Functions

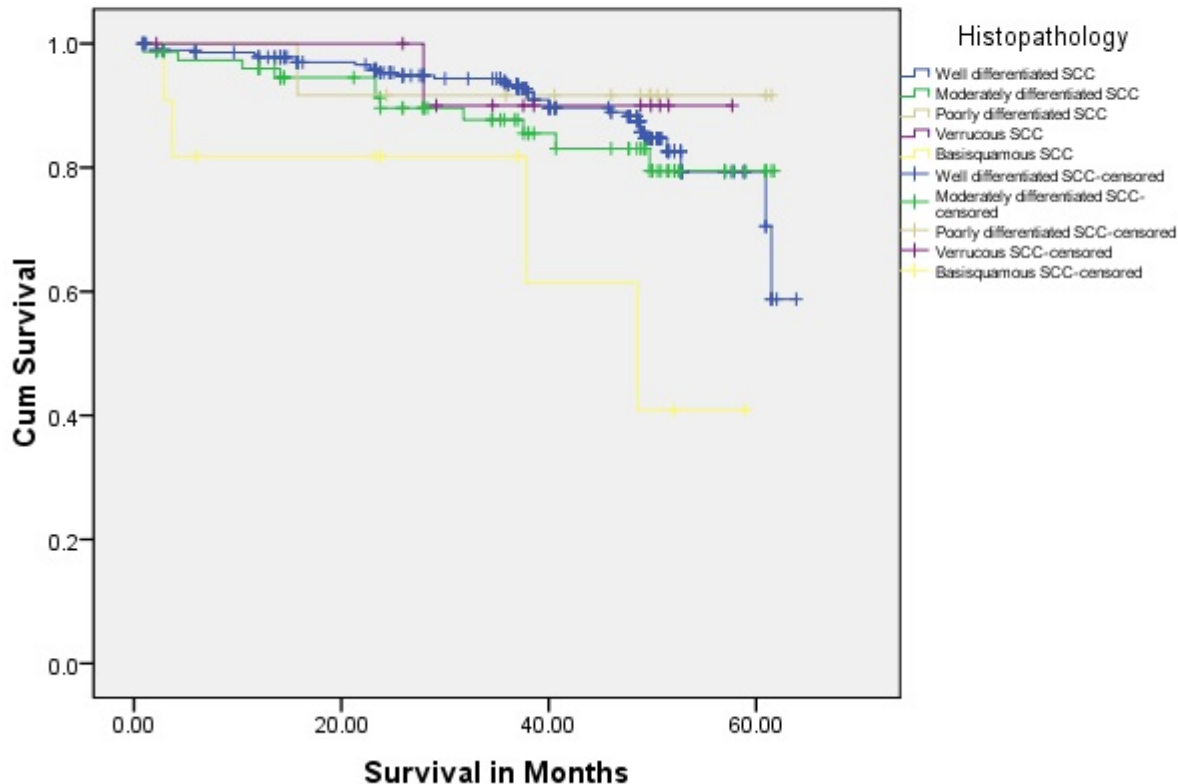

Supplement: MOESM8 [file 9670184]
